# Supplementary material
Source: Springer Nature journal article supplement (https://www.springermedizin.de/resource/supplementary/12936_2008_603_MOESM1_ESM.pdf/9547802)

**TRAINING**

**599**

**1573**

**CMK**

**70**

**No programme**

**108**

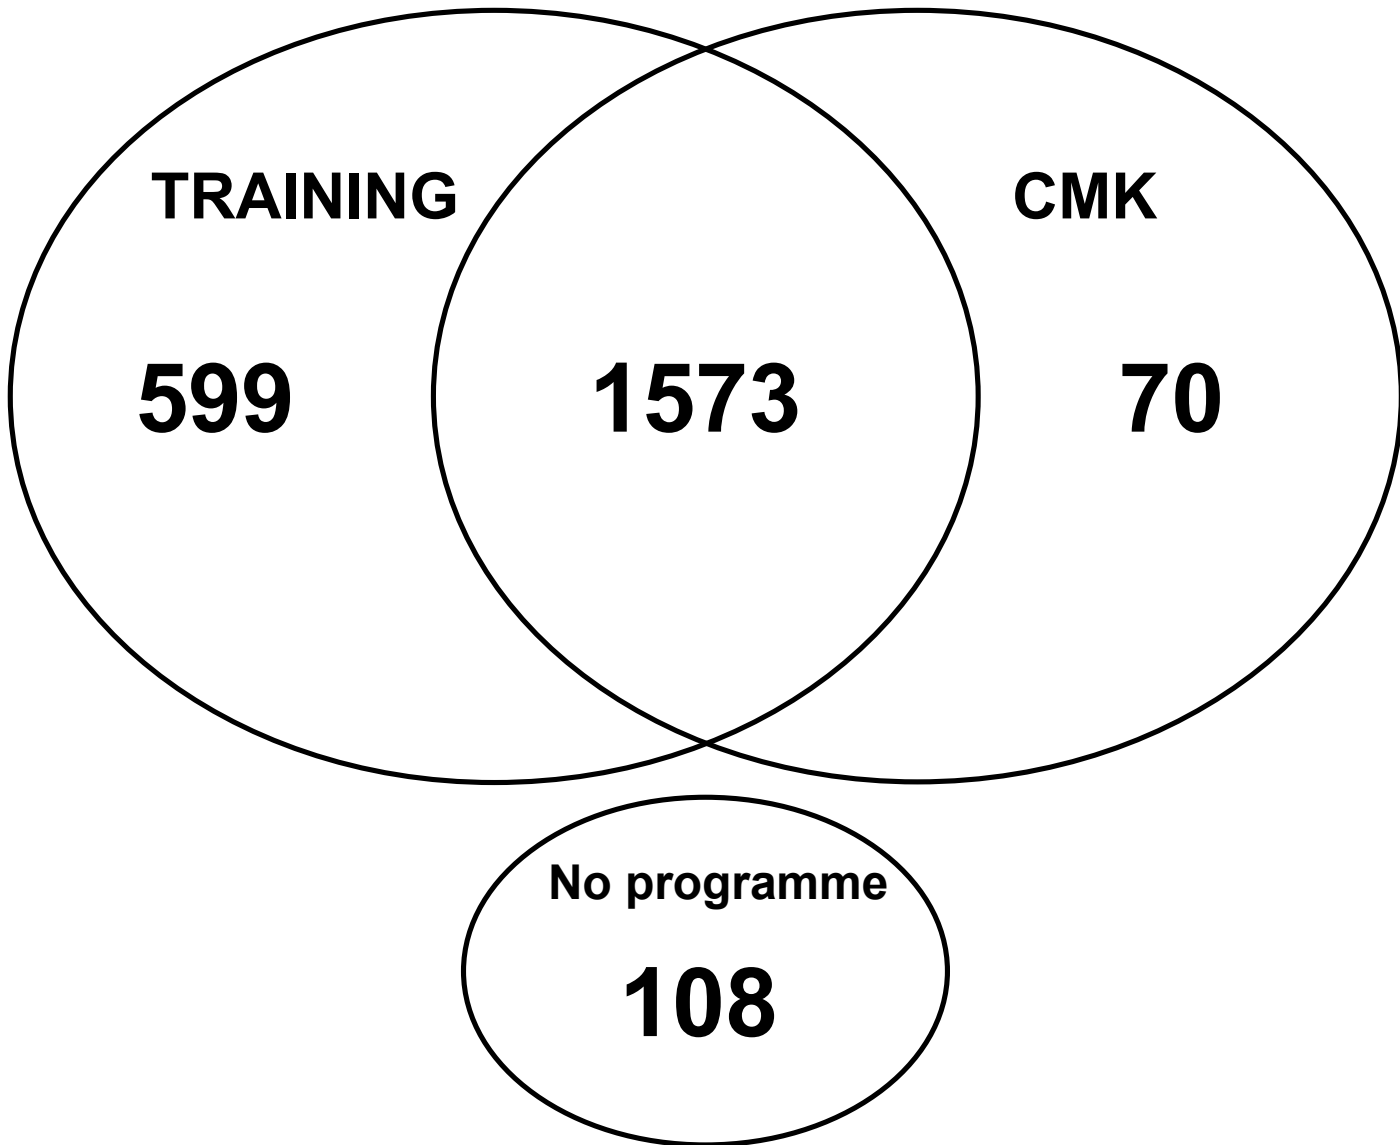

Supplement: MOESM1 [file 9547802]
